# Supplementary material for: A Toolbox for Efficient Proximity-Dependent Biotinylation in Zebrafish Embryos
Source: PubMed Central journal article supplement — Mol Cell Proteomics. 2021 Jul 29;20:100128. doi: 10.1016/j.mcpro.2021.100128 (PMC8383115; doi:10.1016/j.mcpro.2021.100128), 2021-07-29
Supplement: mmc10.pdf [file mmc10.pdf]

Pre- SAINT

- $\text{BFDR} \leq 0.01$
- $0.01 < \text{BFDR} \leq 1$

Post- SAINT

- $\text{BFDR} \leq 0.01$
- $0.01 < \text{BFDR} \leq 0.05$

TurboID-LMNA

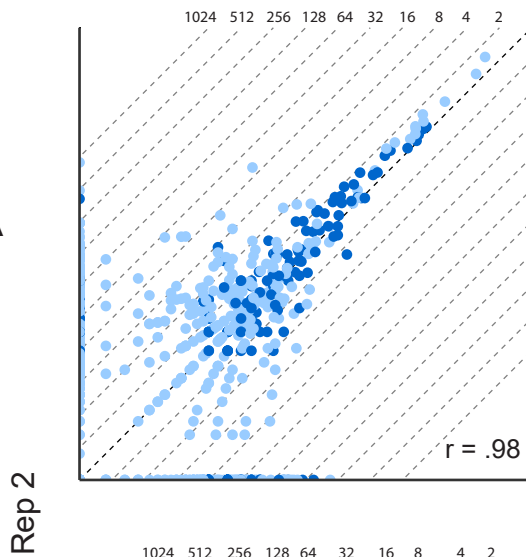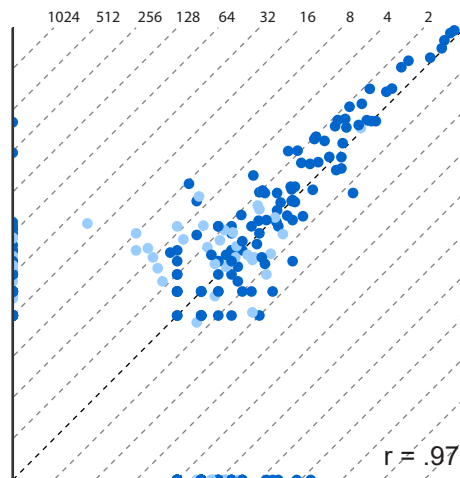

miniTurbo-LMNA

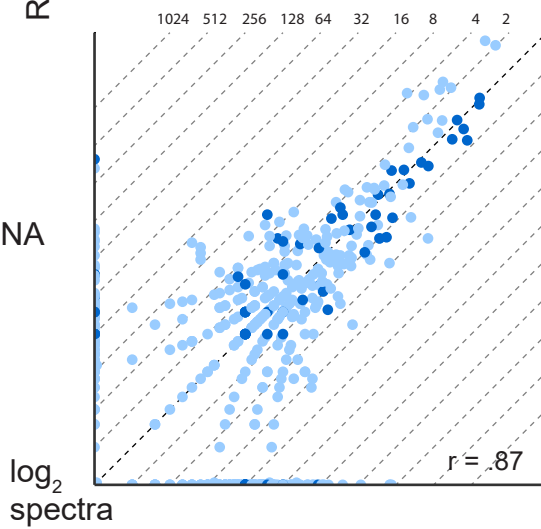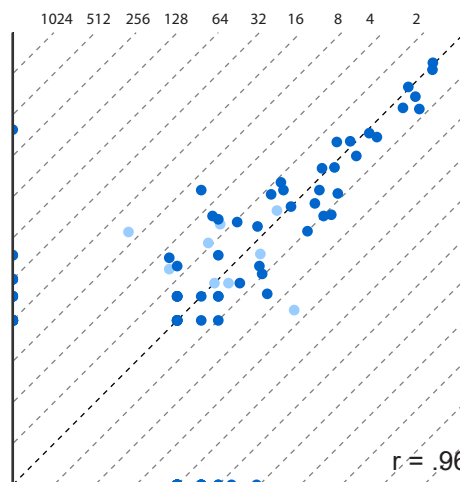

Rep 1
