# Supplementary material for: A Toolbox for Efficient Proximity-Dependent Biotinylation in Zebrafish Embryos
Source: PubMed Central journal article supplement — Mol Cell Proteomics. 2021 Jul 29;20:100128. doi: 10.1016/j.mcpro.2021.100128 (PMC8383115; doi:10.1016/j.mcpro.2021.100128), 2021-07-29

### TurboID-LMNA

#### Pre-SAINT

● BFDR  $\leq$  0.01

●  $0.01 < \text{BFDR} \leq 1$

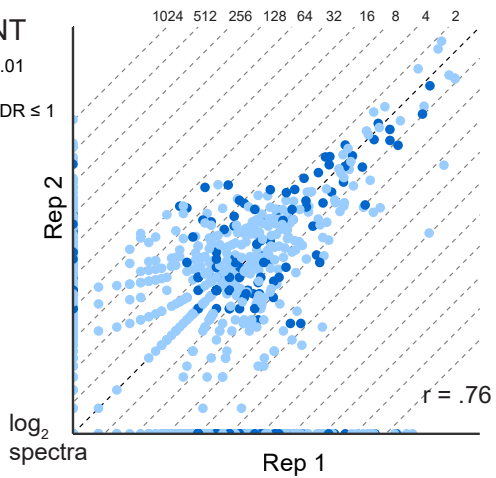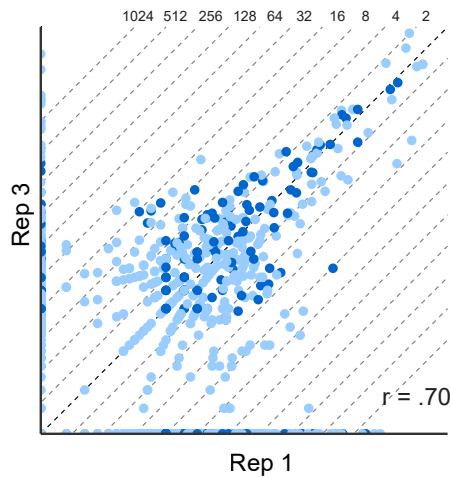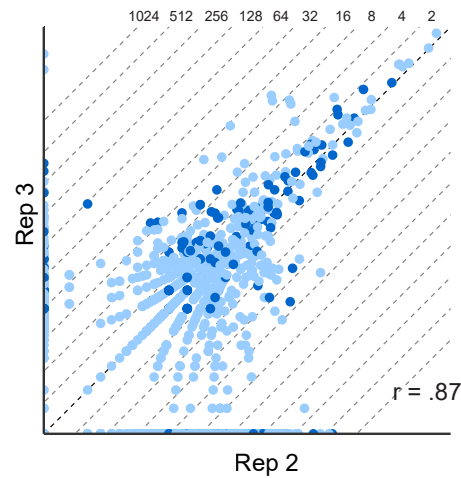

#### Post-SAINT

● BFDR  $\leq$  0.01

●  $0.01 < \text{BFDR} \leq 0.05$

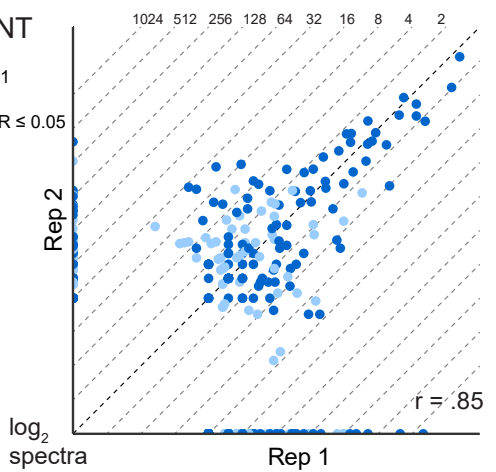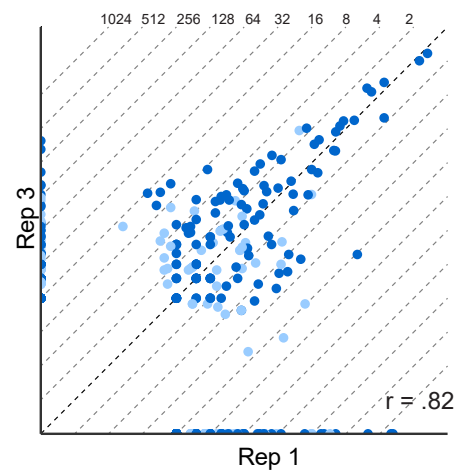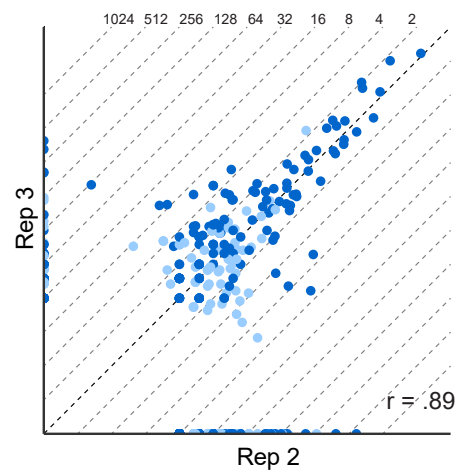

### miniTurbo-LMNA

#### Pre-SAINT

● BFDR  $\leq$  0.01

●  $0.01 < \text{BFDR} \leq 1$

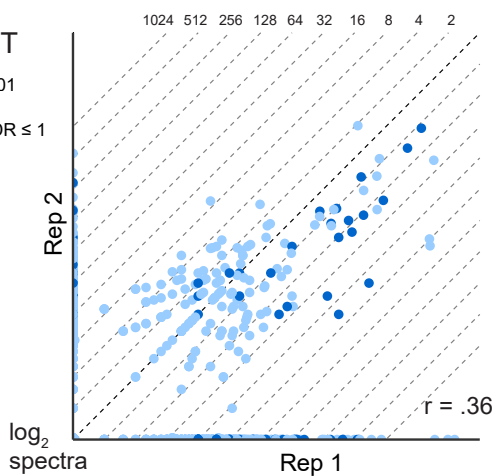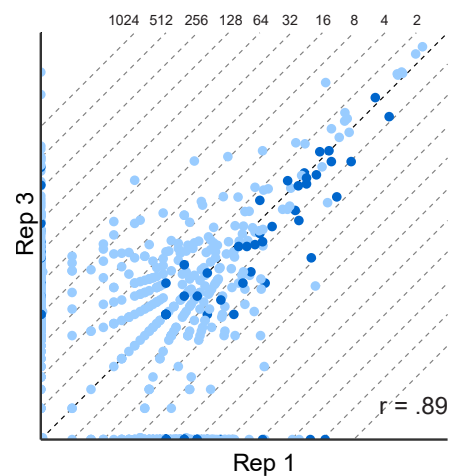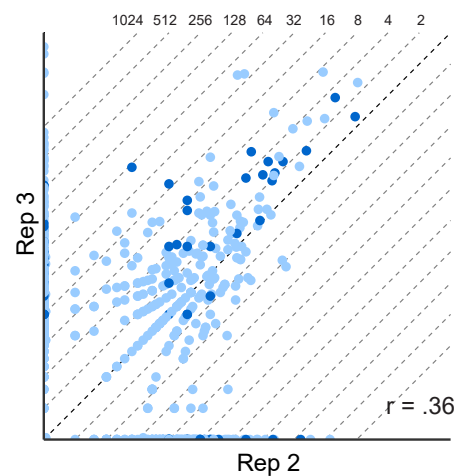

#### Post-SAINT

● BFDR  $\leq$  0.01

●  $0.01 < \text{BFDR} \leq 0.05$

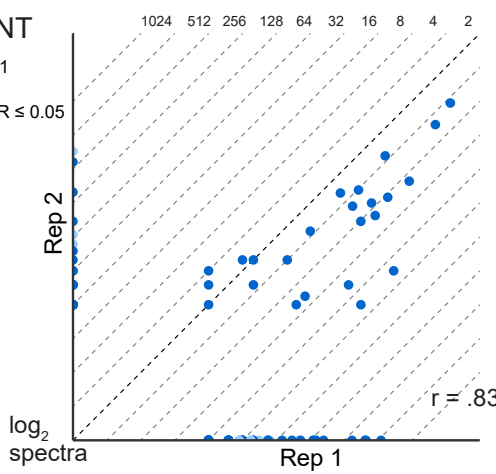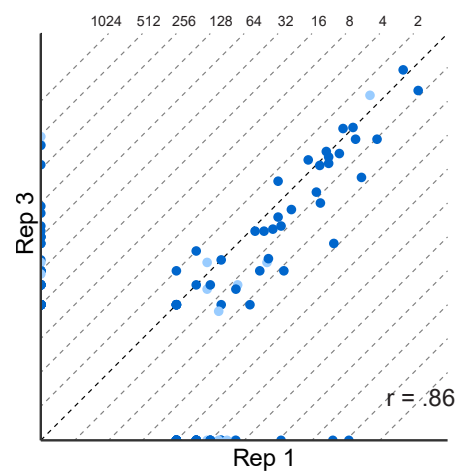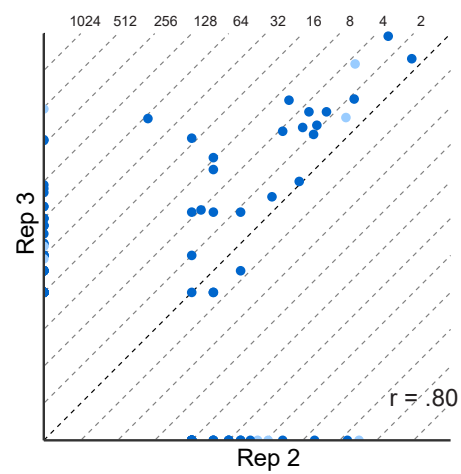

Supplement: mmc11.pdf [file mmc11.pdf]
