# Supplementary figures and images for: A Toolbox for Efficient Proximity-Dependent Biotinylation in Zebrafish Embryos
Source: PubMed Central journal article supplement — Mol Cell Proteomics. 2021 Jul 29;20:100128. doi: 10.1016/j.mcpro.2021.100128 (PMC8383115; doi:10.1016/j.mcpro.2021.100128), 2021-07-29

A

## Pre-SAINT

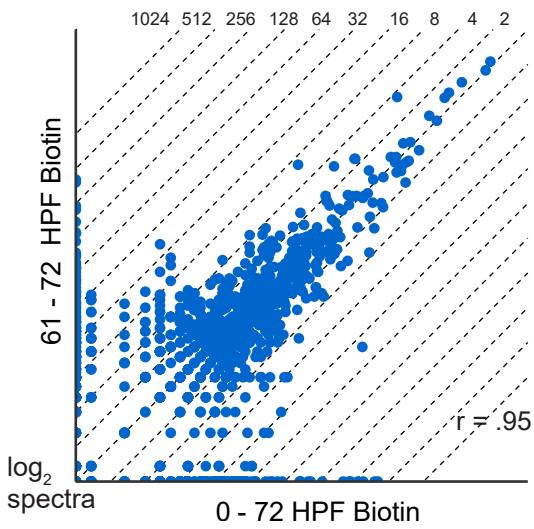

## Post-SAINT

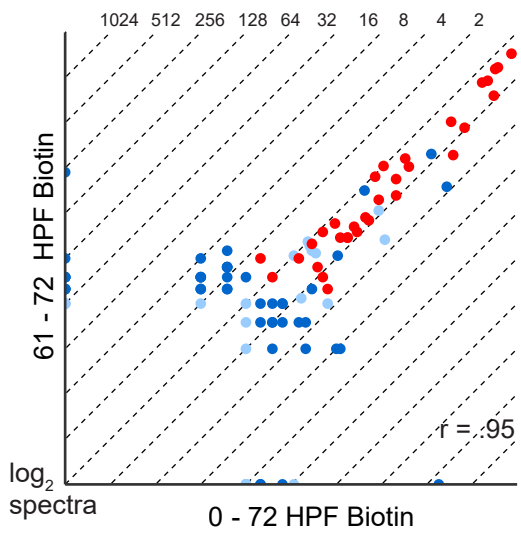

- BFDR ≤ 1%
- Shared ≤ 1% BFDR
- BFDR > 1% - ≤ 5%

C

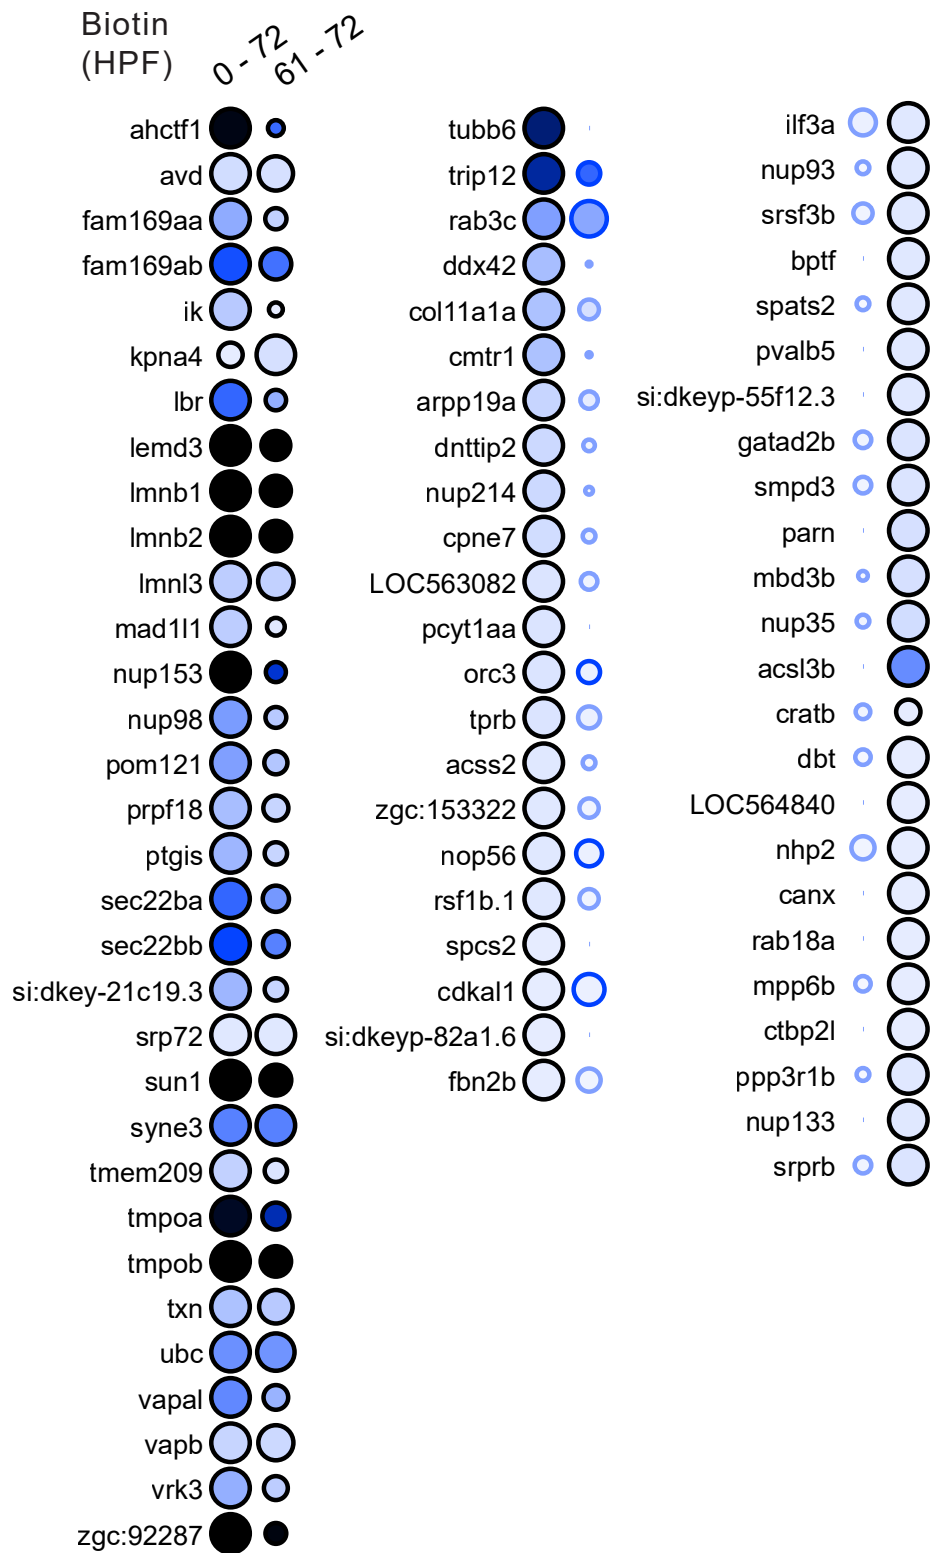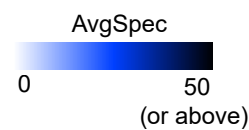

Relative abundance

Legend for BFDR:
 

- ≤ 1%
- ≤ 5% BFDR
- > 5%

B

0 - 72 HPF      61 - 72 HPF

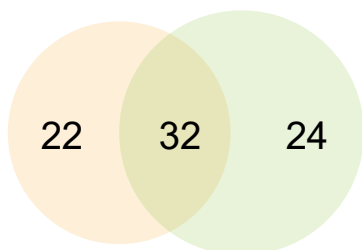

Supplement: mmc13.pdf [file mmc13.pdf]

pCS2+ TurboID

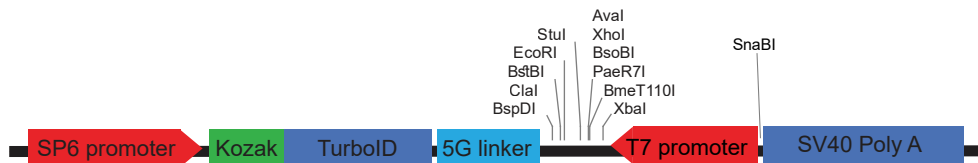

pCS2+ miniTurbo

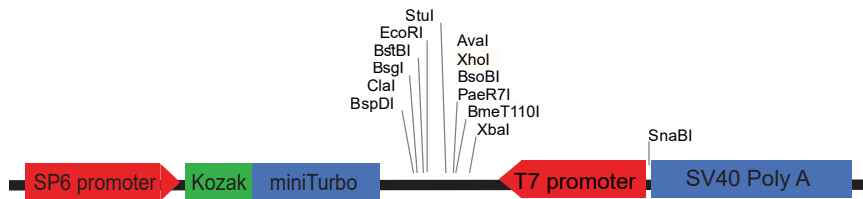

pME TurboID

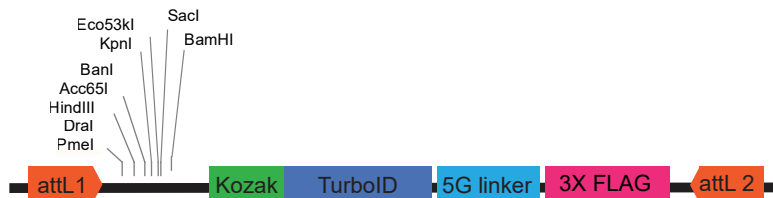

pME miniTurbo

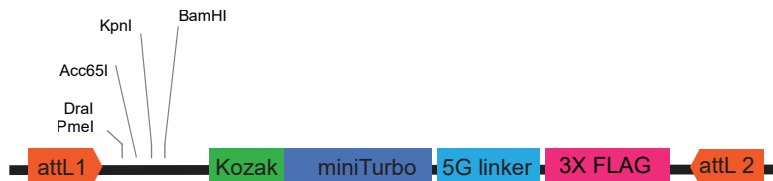

Supplement: mmc14.pdf [file mmc14.pdf]

**A**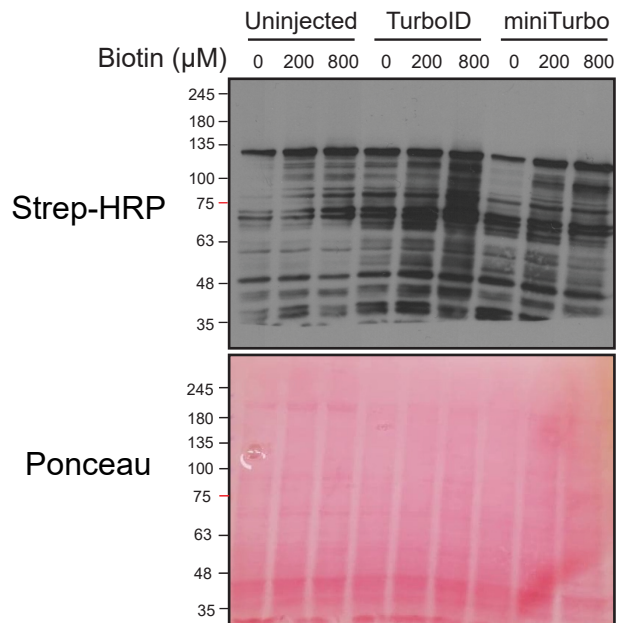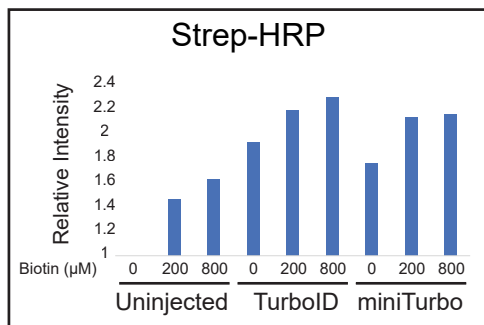**B**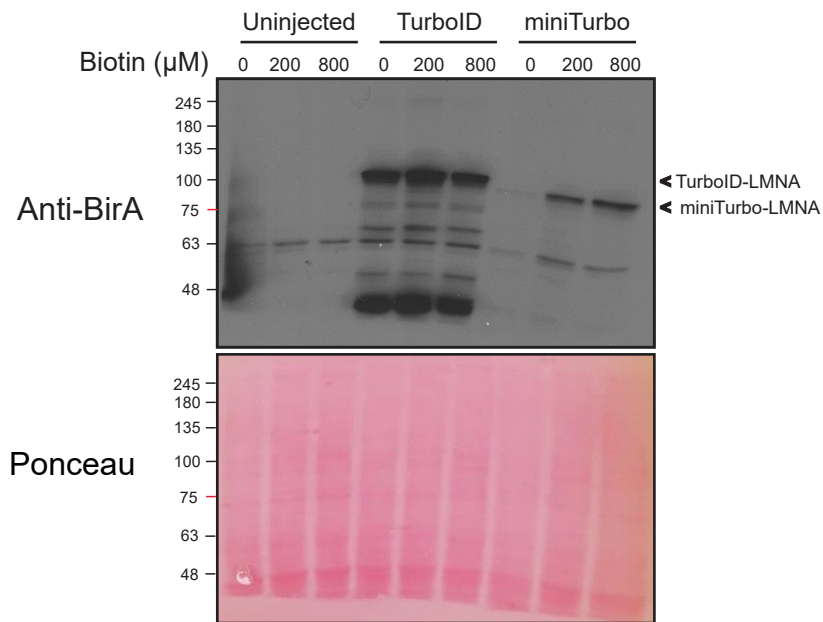

Supplement: mmc9.pdf [file mmc9.pdf]
